# Supplementary figures and images for: Cellular and synaptic reorganization of arcuate NPY/AgRP and POMC neurons after exercise
Source: PubMed Central journal article supplement — Mol Metab. 2018 Sep 12;18:107–19. doi: 10.1016/j.molmet.2018.08.011 (PMC6308029; doi:10.1016/j.molmet.2018.08.011), 2018-09-12

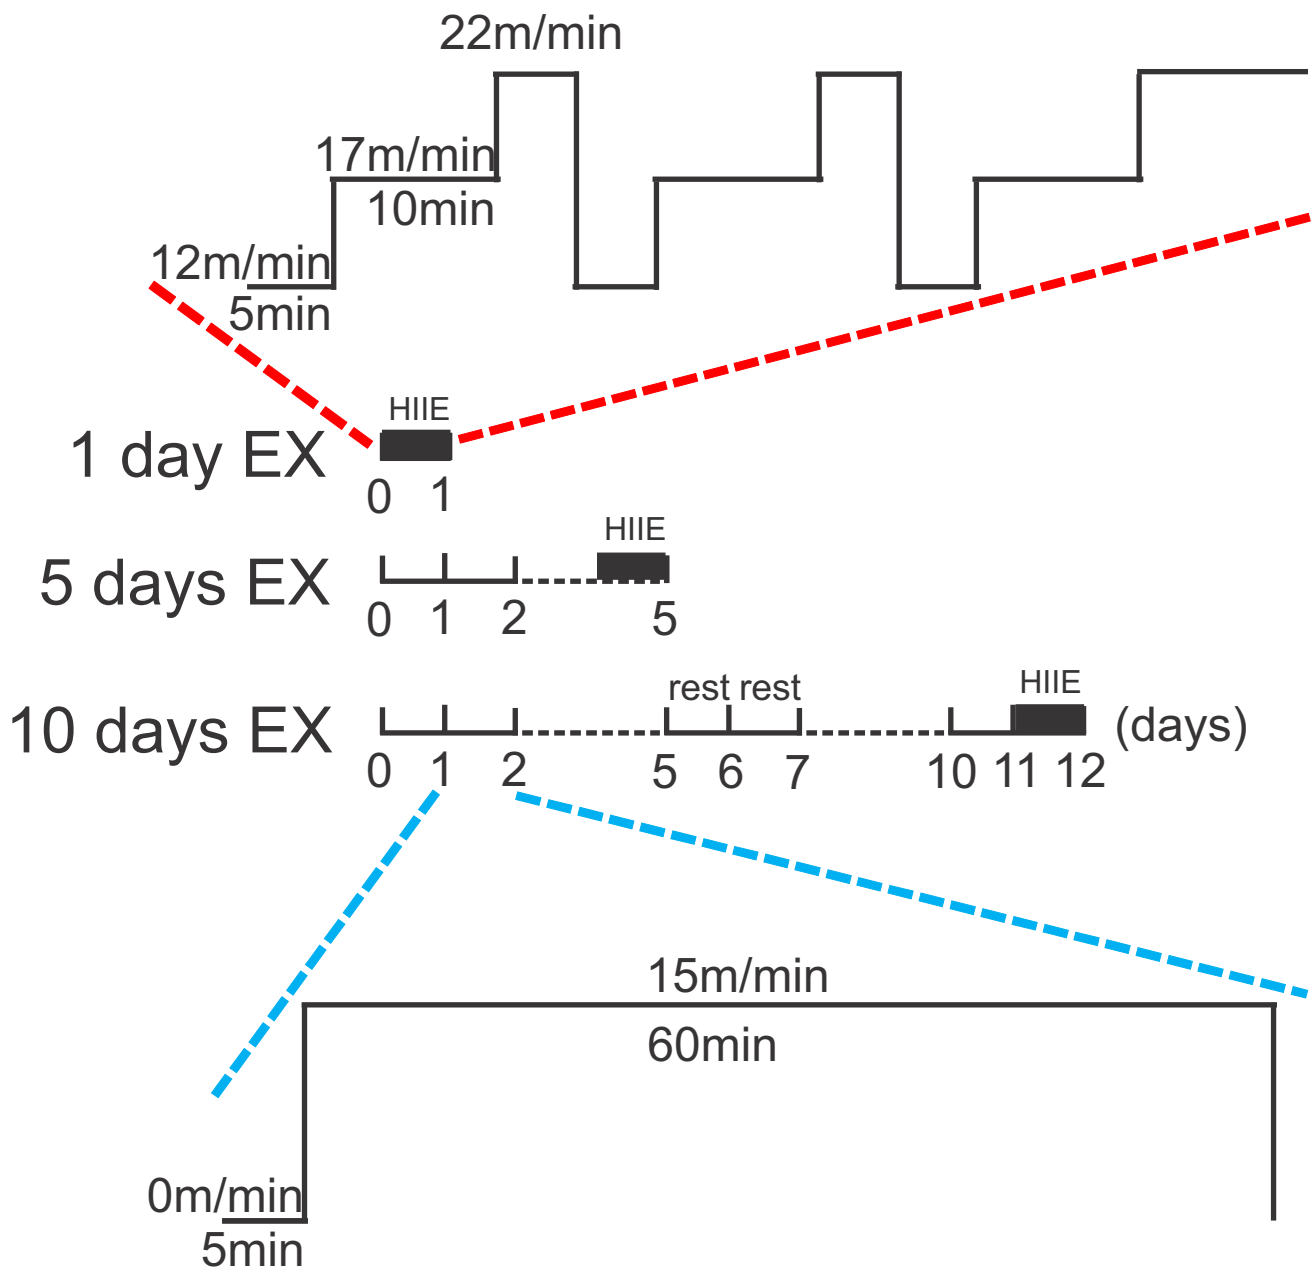

Supplement: mmc1.pdf [file mmc1.pdf]

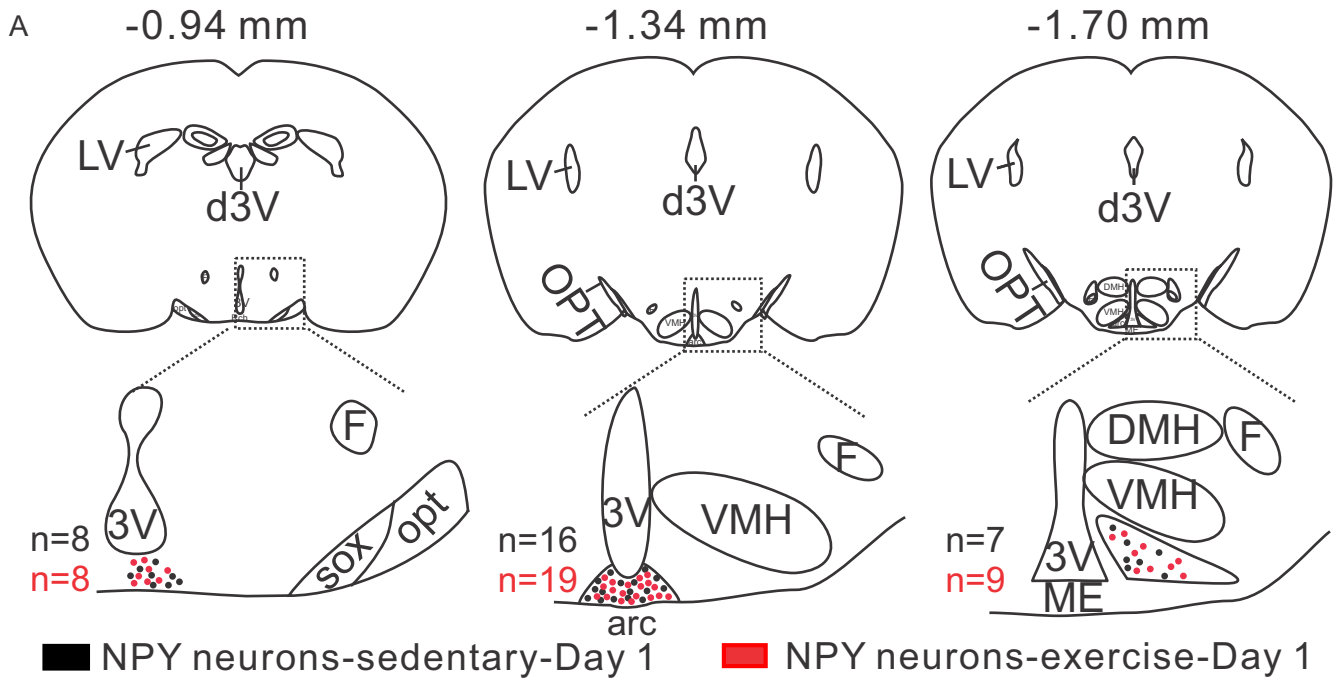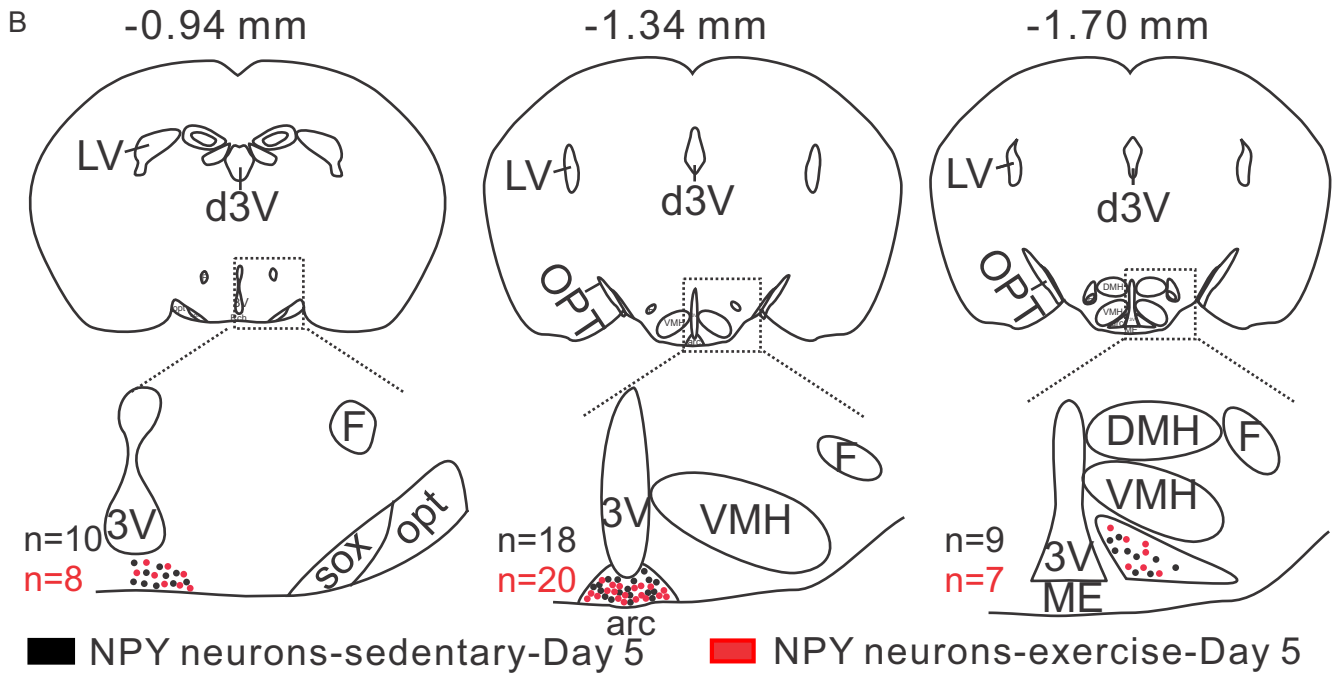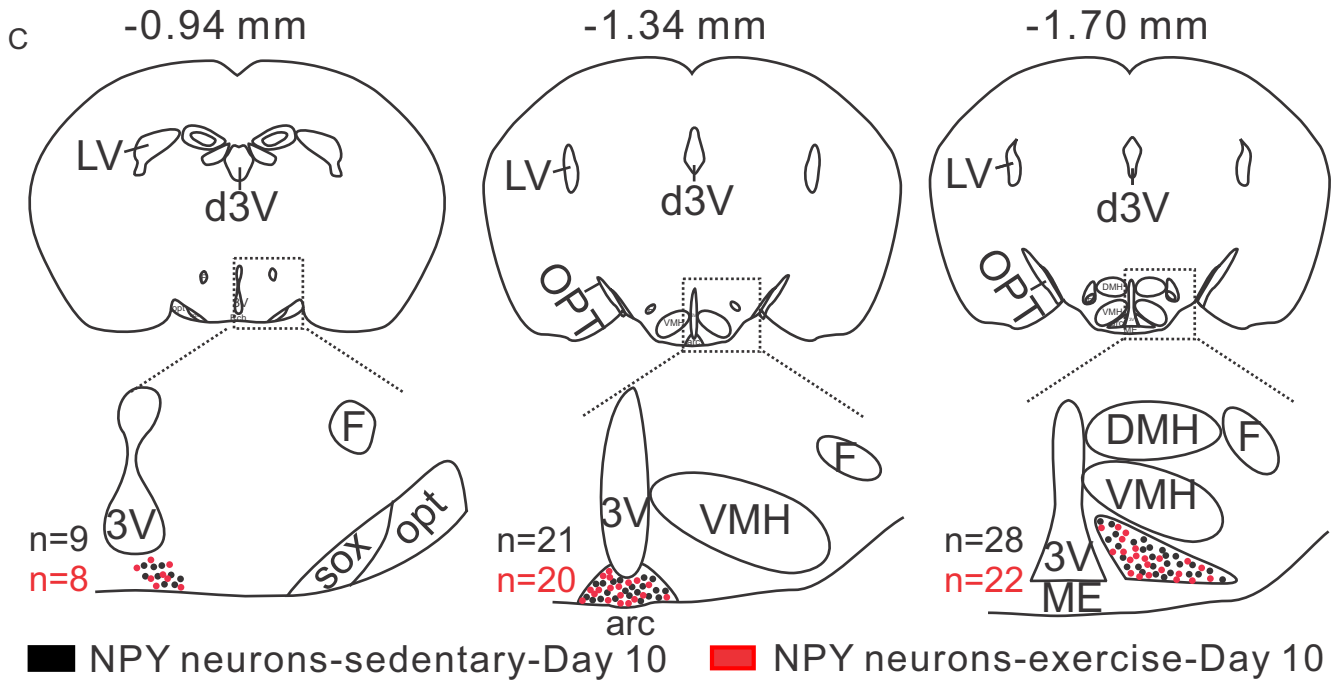

Supplement: mmc2.pdf [file mmc2.pdf]

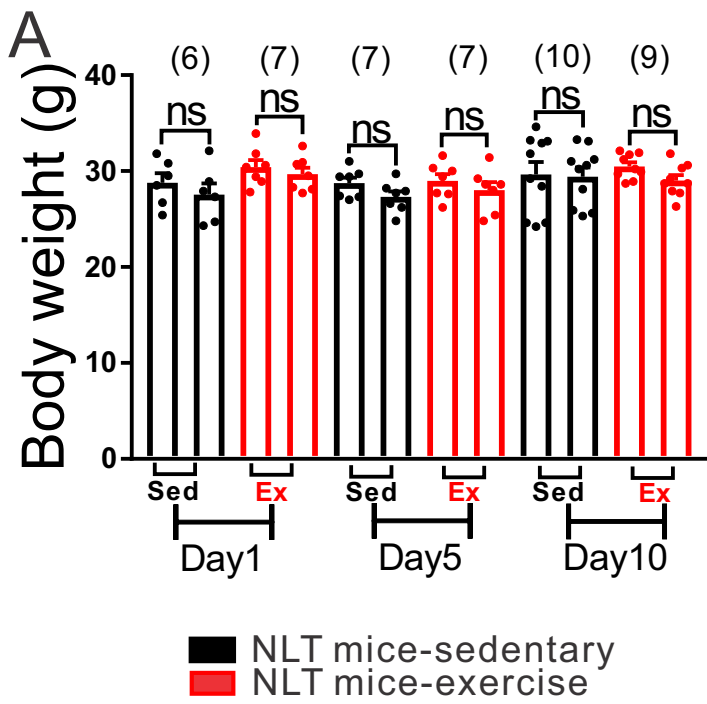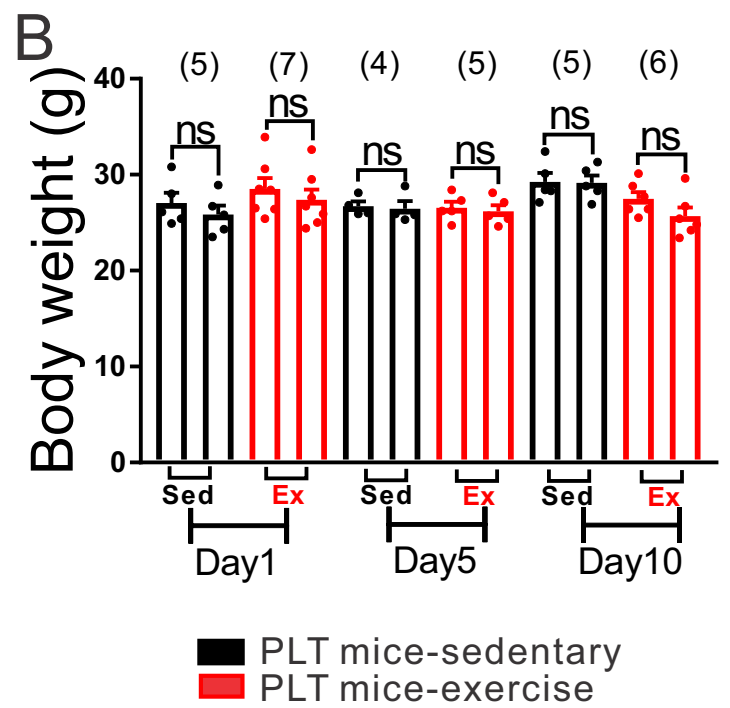

Supplement: mmc3.pdf [file mmc3.pdf]

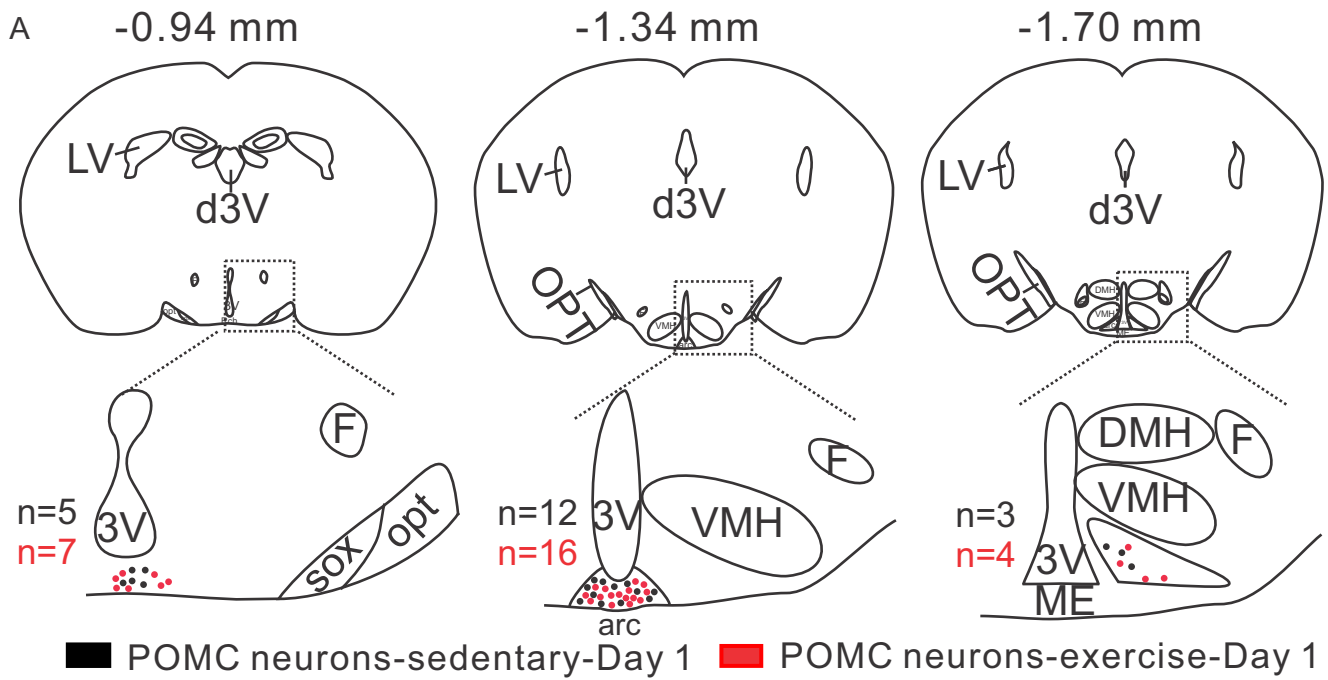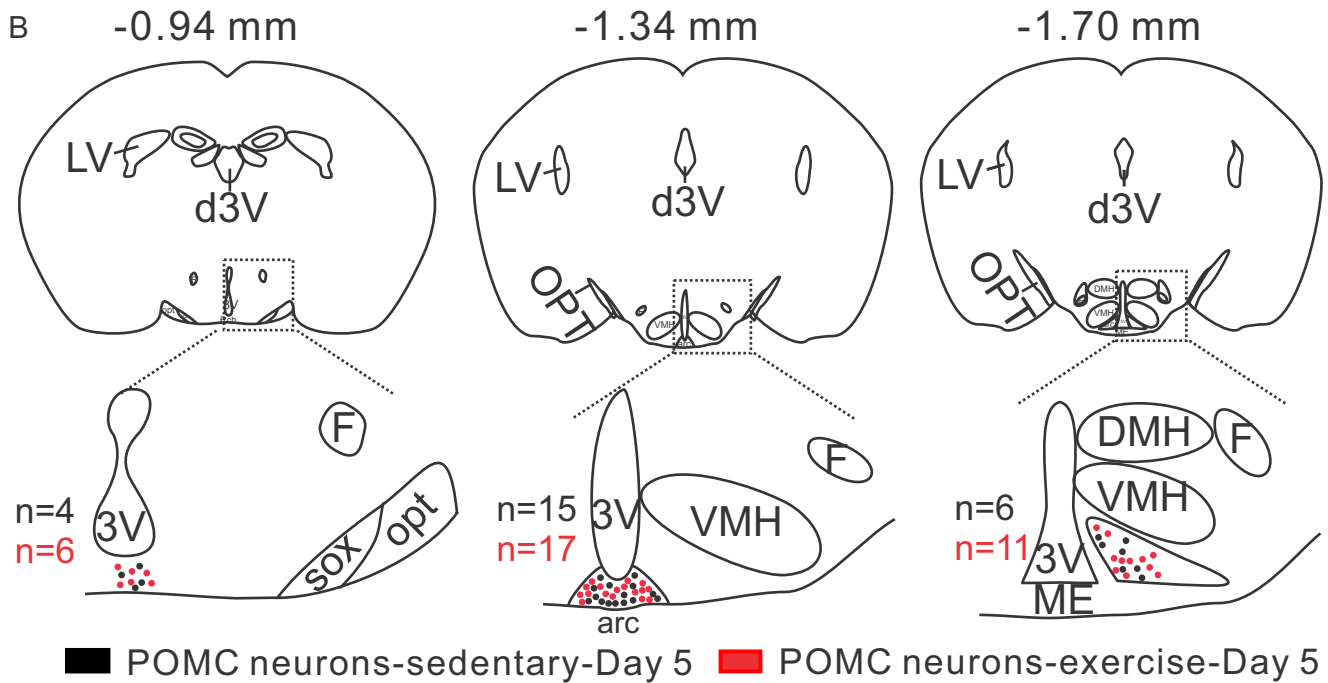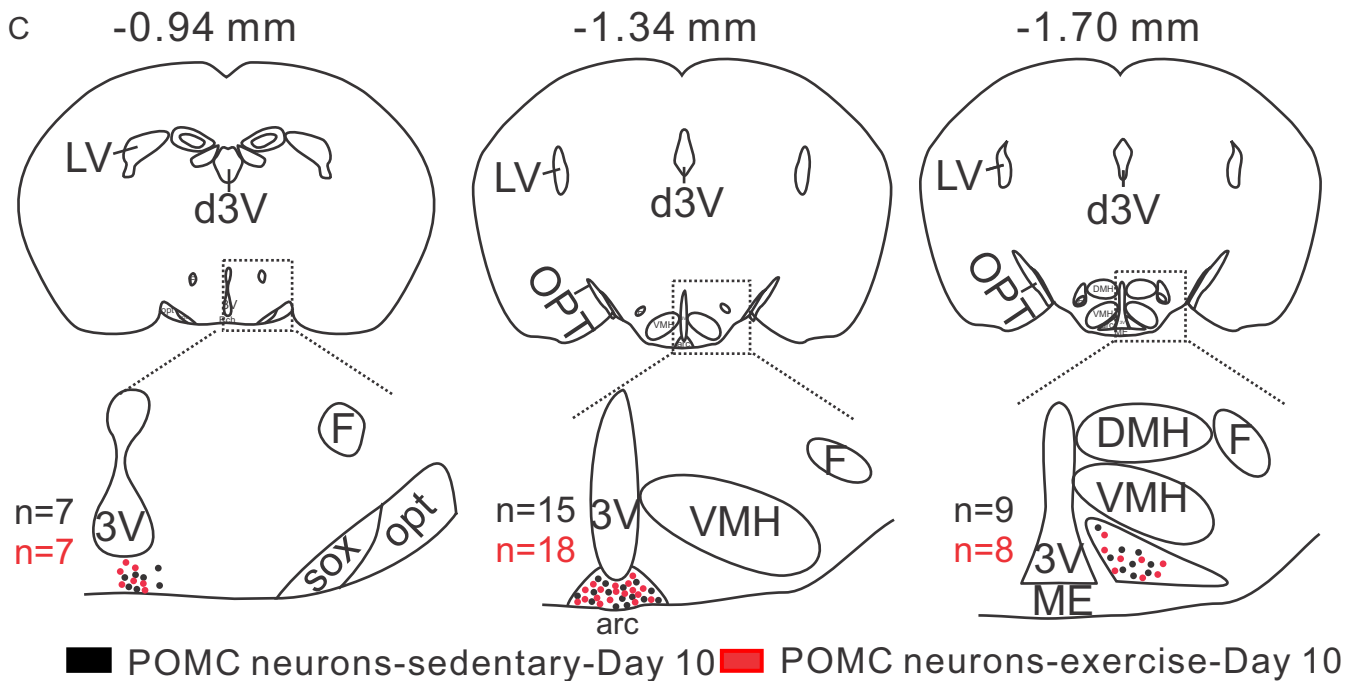

Supplement: mmc4.pdf [file mmc4.pdf]

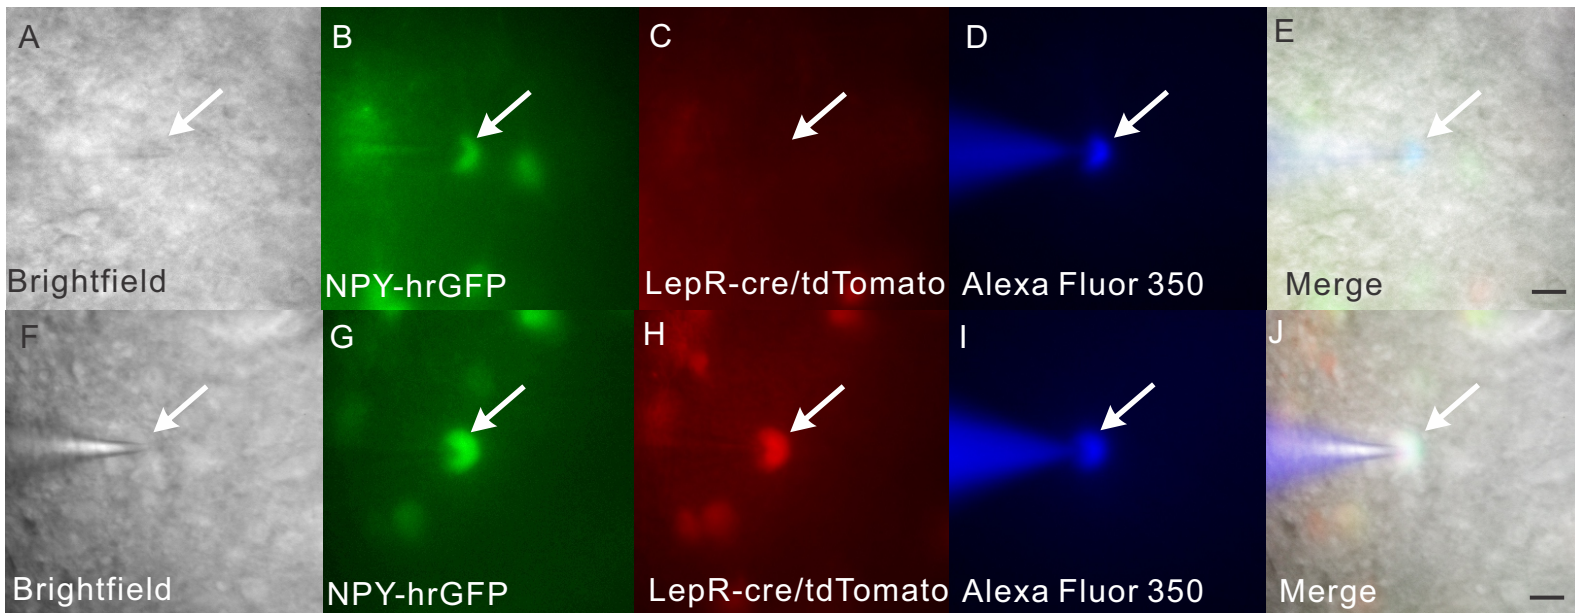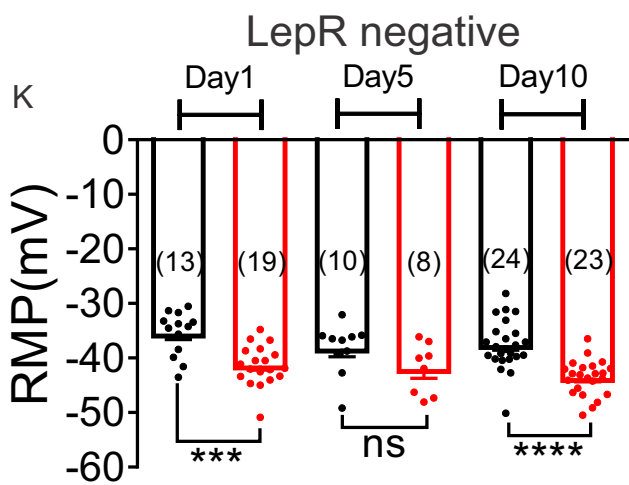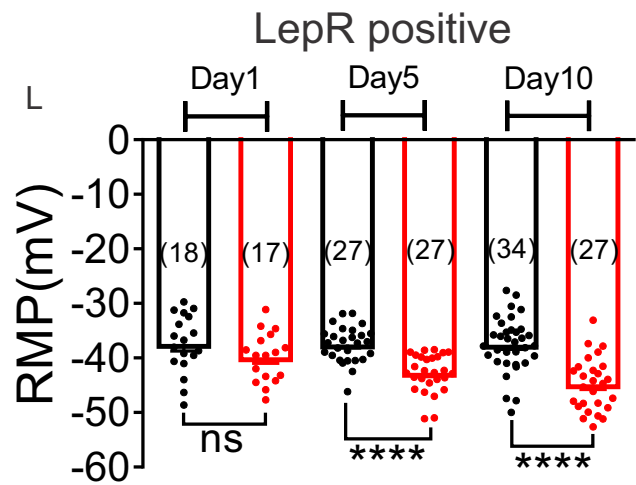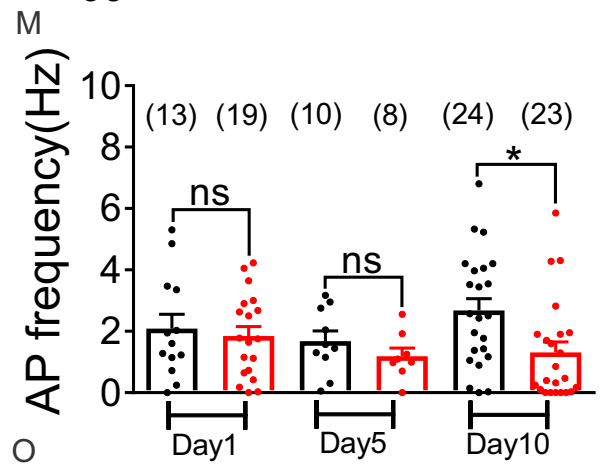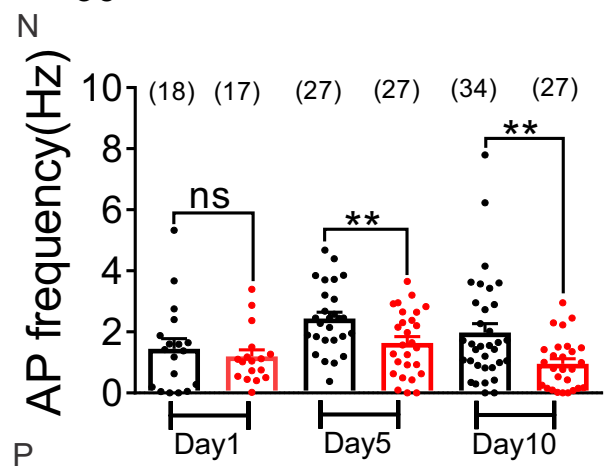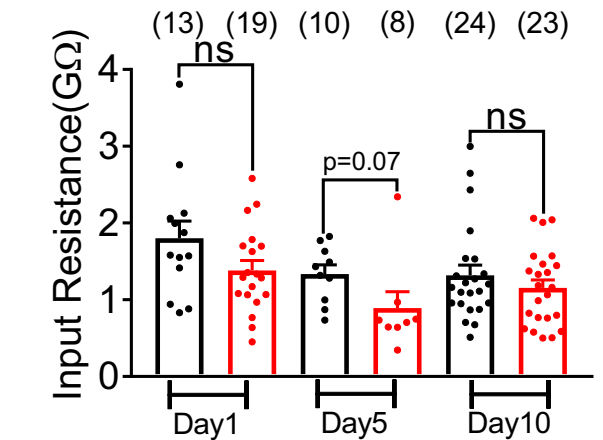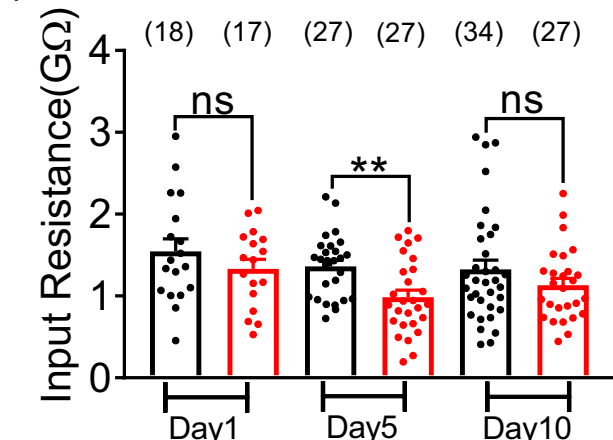

■ NPY neuron-sedentary

■ NPY neuron-exercise

Supplement: mmc5.pdf [file mmc5.pdf]

### LepR negative

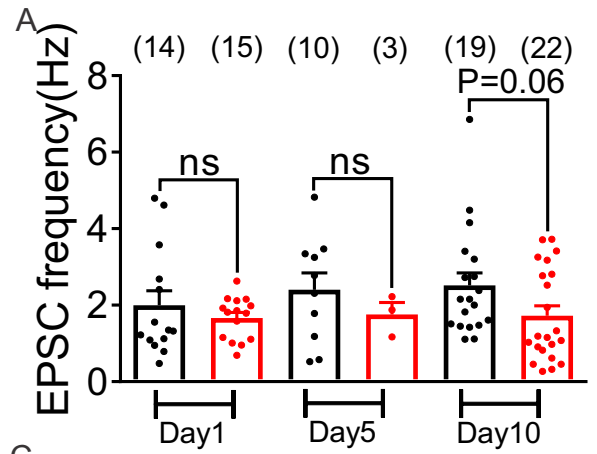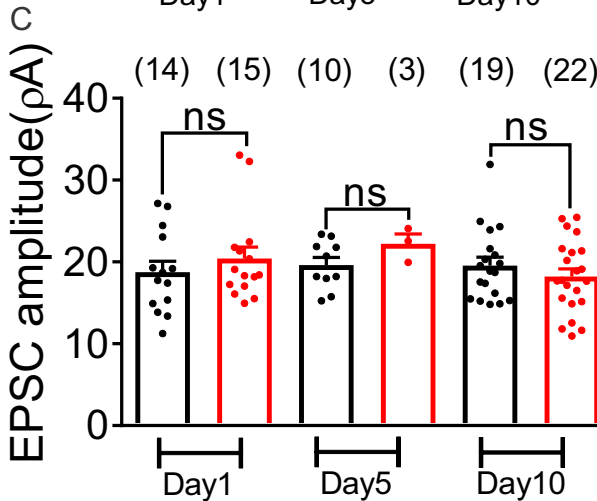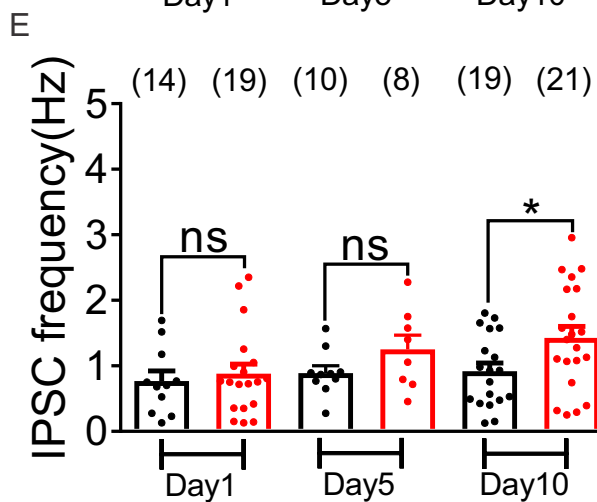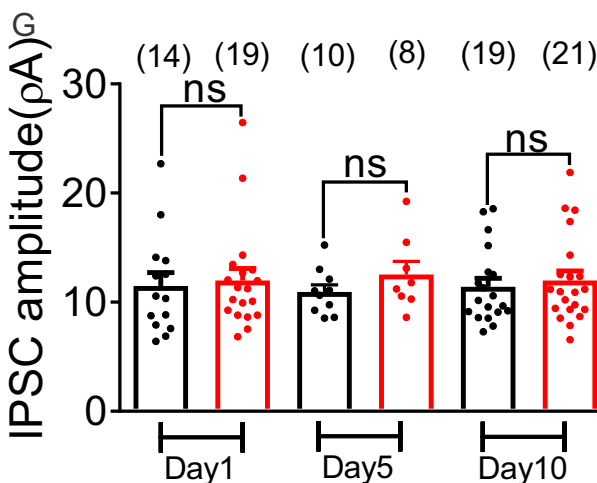

### LepR positive

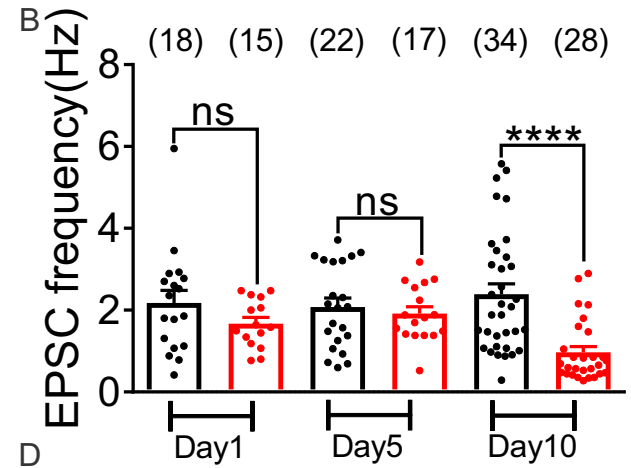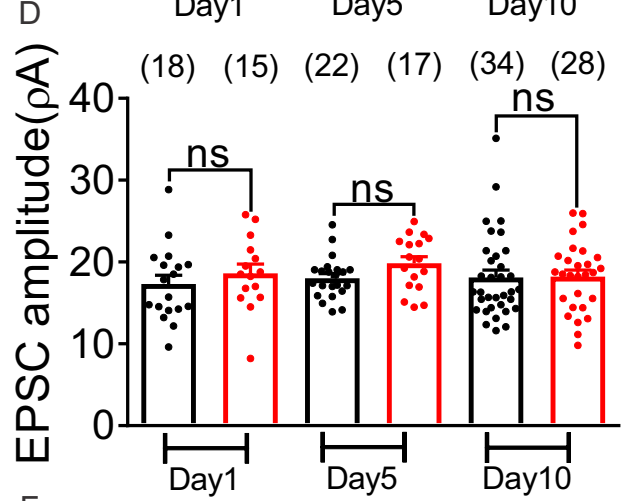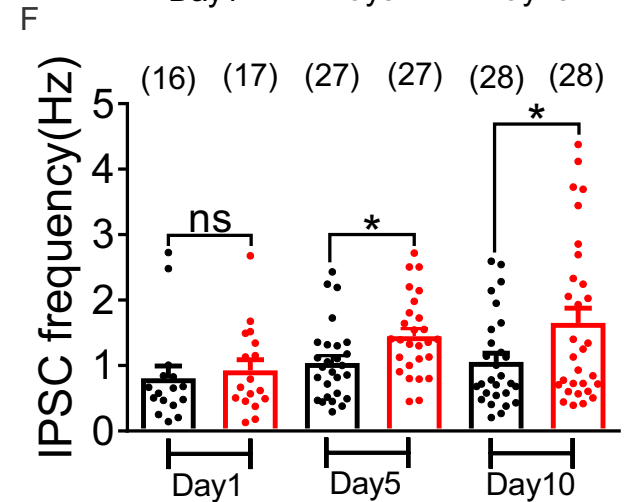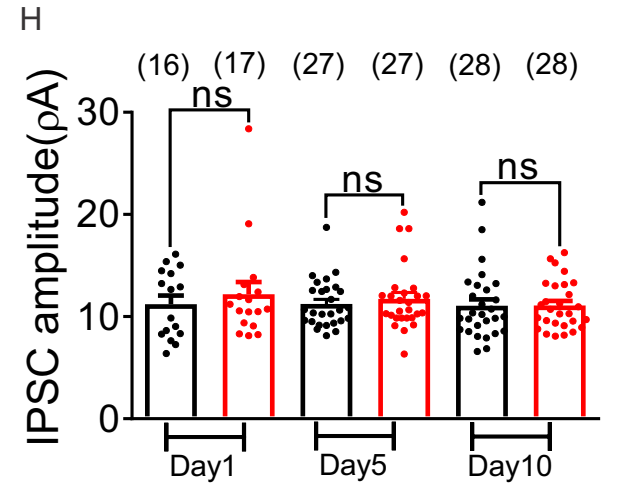

■ NPY neuron-sedentary

■ NPY neuron-exercise

Supplement: mmc6.pdf [file mmc6.pdf]

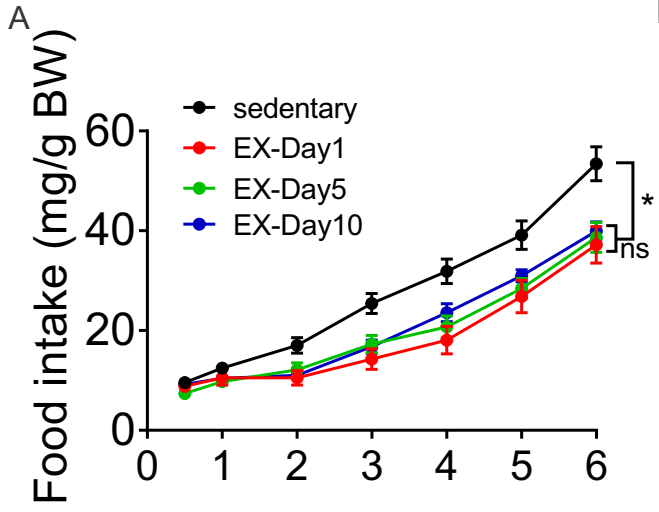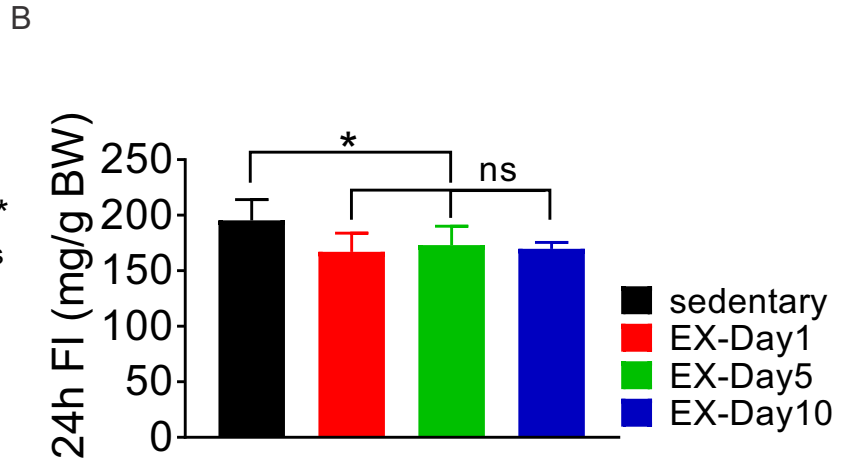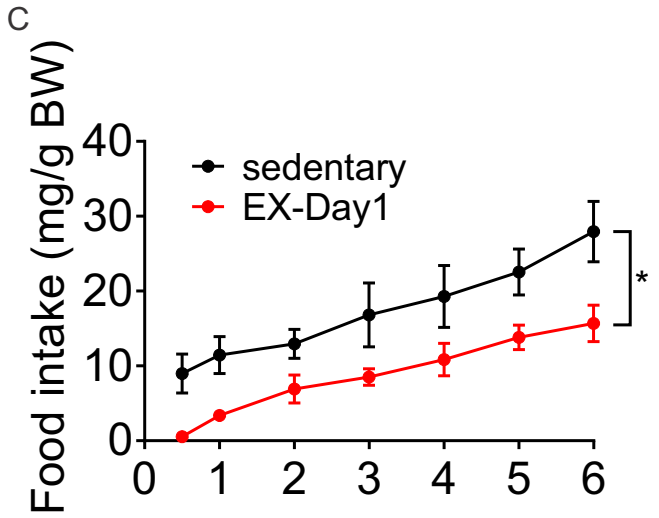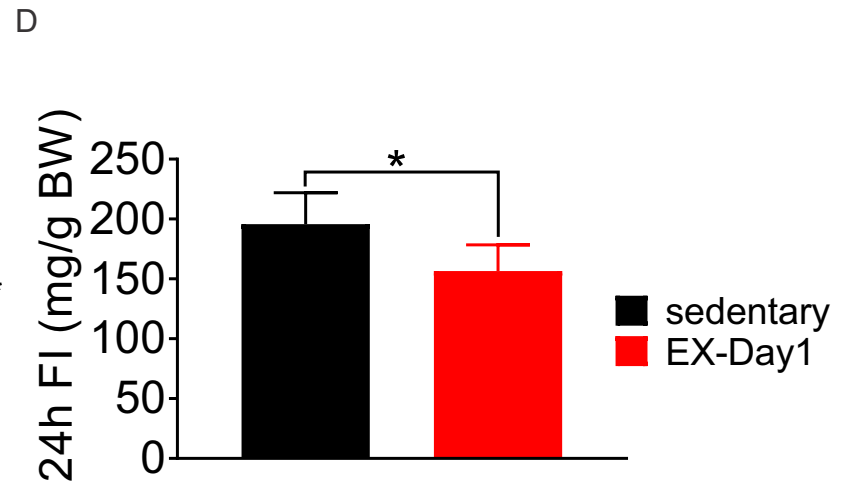

Supplement: mmc7.pdf [file mmc7.pdf]

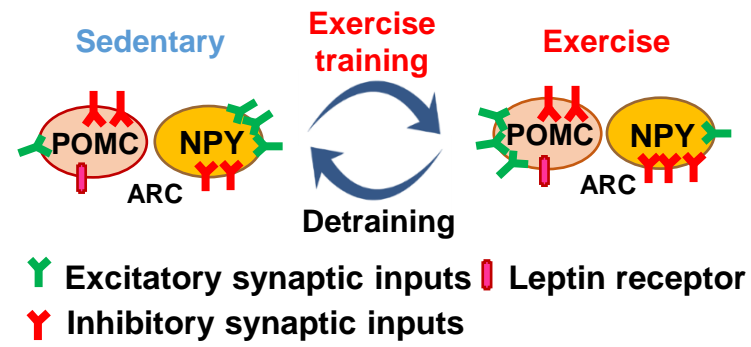

Supplement: mmc8.pdf [file mmc8.pdf]
